# Supplementary material
Source: PubMed Central journal article supplement (PMC4249242)
Supplement: AEM.02413-14_zam999105846so1.pdf [file AEM.02413-14_zam999105846so1.pdf]

1 **TABLE S1.** Concentration (mmol/mg protein) of intracellular ATP for strains grown in chemically  
 2 defined medium (CDM), supplemented with caffeic, *p*-coumaric and ferulic acids (2 mM), after  
 3 fermentation for 24 h at 30°C with lactic acid bacteria strains.

| Strains                            | Media *                 | nmol ATP/ mg protein     |
|------------------------------------|-------------------------|--------------------------|
| <i>W. cibaria</i> P9               | Control                 | 24.0 ± 1.0 <sup>e</sup>  |
|                                    | caffeic acid            | 37.8 ± 1.5 <sup>ab</sup> |
|                                    | <i>p</i> -coumaric acid | 16.7 ± 1.2 <sup>g</sup>  |
|                                    | ferulic acid            | 27.6 ± 1.1 <sup>d</sup>  |
| <i>W. cibaria/confusa</i><br>POM12 | Control                 | 25.5 ± 1.2 <sup>e</sup>  |
|                                    | caffeic acid            | 29.5 ± 1.1 <sup>cd</sup> |
|                                    | <i>p</i> -coumaric acid | 33.1 ± 0.8 <sup>bc</sup> |
| <i>L. curvatus</i> PE5             | Control                 | 16.0 ± 0.8 <sup>g</sup>  |
|                                    | caffeic acid            | 24.2 ± 1.1 <sup>e</sup>  |
|                                    | <i>p</i> -coumaric acid | 22.5 ± 1.1 <sup>f</sup>  |
|                                    | ferulic acid            | 16.9 ± 1.2 <sup>g</sup>  |
| <i>L. rossiae</i> 2MR8             | Control                 | 31.0 ± 1.2 <sup>c</sup>  |
|                                    | ferulic acid            | 15.1 ± 0.8 <sup>g</sup>  |

4 \*Chemically defined basal medium prepared as described by McFeeters and Chen (R. F. McFeeter,  
 5 and K. H. Chen, Food Microbiol. 3:73-81, 1986), and supplemented with caffeic (caffeic acid), *p*-  
 6 coumaric (*p*-coumaric acid), or ferulic (ferulic acid) acids at a concentration of 2 mM, or not  
 7 supplemented with hydroxycinnamic acids was used as the control (control).

8 The data are the means of three independent experiments ± standard deviations (n = 3).

9 <sup>a-g</sup>, Means within the column with different superscript letters are significantly different (P<0.05).

10

11
